# Supplementary material for: Serum matrix metalloproteinase-1 level represents disease activity as opposed to fibrosis in patients with histologically proven nonalcoholic steatohepatitis
Source: PubMed Central journal article supplement — Clin Mol Hepatol. 2017 Nov 20;24(1):61–76. doi: 10.3350/cmh.2017.0030 (PMC5875199; doi:10.3350/cmh.2017.0030), 2017-11-20
Supplement: cmh-2017-0030-suppl2.pdf [file cmh-2017-0030-suppl2.pdf]

**Supplementary Table 2.** Correlation between serum levels of MMPs, TIMPs, cytokines, and histological characteristic scores

|         | Steatosis                   |         | Inflammation                |         | Ballooning                  |         | Fibrosis                    |         |
|---------|-----------------------------|---------|-----------------------------|---------|-----------------------------|---------|-----------------------------|---------|
|         | Correlation coefficient (r) | P-value |
| MMP-1   | 0.075                       | 0.635   | 0.068                       | 0.663   | 0.215                       | 0.167   | -0.131                      | 0.402   |
| MMP-2   | 0.064                       | 0.669   | 0.188                       | 0.206   | 0.096                       | 0.522   | 0.286                       | 0.051   |
| MMP-9   | 0.182                       | 0.22    | 0.085                       | 0.572   | 0.188                       | 0.206   | -0.116                      | 0.436   |
| TIMP-1  | 0.227                       | 0.125   | 0.256                       | 0.082   | 0.359*                      | 0.013*  | 0.304*                      | 0.038*  |
| TIMP-2  | 0.069                       | 0.644   | 0.19                        | 0.201   | 0.315*                      | 0.031*  | 0.275                       | 0.062   |
| SDF-1α  | 0.415*                      | 0.005*  | 0.522*                      | <0.001* | 0.433*                      | 0.002*  | 0.649*                      | <0.001* |
| SCF -1  | 0.047                       | 0.775   | 0.151                       | 0.358   | 0.049                       | 0.769   | 0.233                       | 0.153   |
| SCGF-β  | 0.36*                       | 0.025*  | 0.4*                        | 0.012*  | 0.416*                      | 0.008*  | 0.295                       | 0.069   |
| MCP-1   | 0.472*                      | 0.002*  | 0.443*                      | 0.005*  | 0.529*                      | 0.001*  | 0.321*                      | 0.046*  |
| G-CSF   | 0.048                       | 0.861   | 0.2                         | 0.458   | 0.139                       | 0.607   | 0.03                        | 0.912   |
| Leptin  | 0.505*                      | 0.001*  | 0.483*                      | 0.002*  | 0.453*                      | 0.004*  | 0.334*                      | 0.038*  |
| Ghrelin | -0.151                      | 0.371   | -0.077                      | 0.649   | -0.178                      | 0.293   | -0.169                      | 0.317   |

MMP, matrix metalloproteinase; TIMP, tissue inhibitors of metalloproteinase; SDF, stromal cell-derived factor; SCF, stem cell factor; SCGF-β, stem cell growth factor-β; MCP, monocyte chemotactic protein; G-CSF, granulocyte-colony stimulating factor.

\*P<0.05.
